# Supplementary material for: Exploring optimal in situ fabrication conditions to realize core–shell CsPbBr3 QDs with high PLQYs and structural stability by dual-defect passivation
Source: Royal Society of Chemistry journal article supplement (doi:10.1039/d4nr04890c), 2025-01-01
Supplement: d4nr04890c4.pdf [file d4nr04890c4.pdf]

## Electronic Supplementary Information

### **Exploring optimal *in-situ* fabrication conditions to realize core–shell CsPbBr<sub>3</sub> QDs with high PLQYs and structural stabilities by dual-defect passivation<sup>‡</sup>**

Dokyum Kim,<sup>‡a</sup> Soogeun Kim,<sup>‡a</sup> Sang-Youp Yim,<sup>a</sup> and Chang-Lyoul Lee<sup>\*a</sup>

<sup>a</sup>Advanced Photonics Research Institute (APRI), Gwangju Institute of Science and Technology (GIST), Gwangju 61005, Republic of Korea

<sup>‡</sup> These authors contributed equally.

\*Address for correspondence:

Chang-Lyoul Lee, Ph.D.

Advanced Photonics Research Institute (APRI), Gwangju Institute of Science and Technology (GIST)

123 Cheomdan-gwagiro (Oryong-dong), Buk-gu, Gwangju 61005, Republic of Korea

E-mail addresses: vsepr@gist.ac.kr

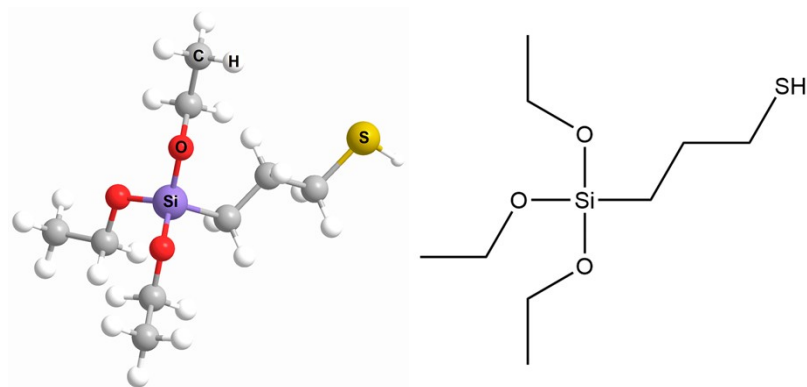

**Figure S1.** Molecular structure of (3-mercaptopropyl)triethoxysilane (MPTES).

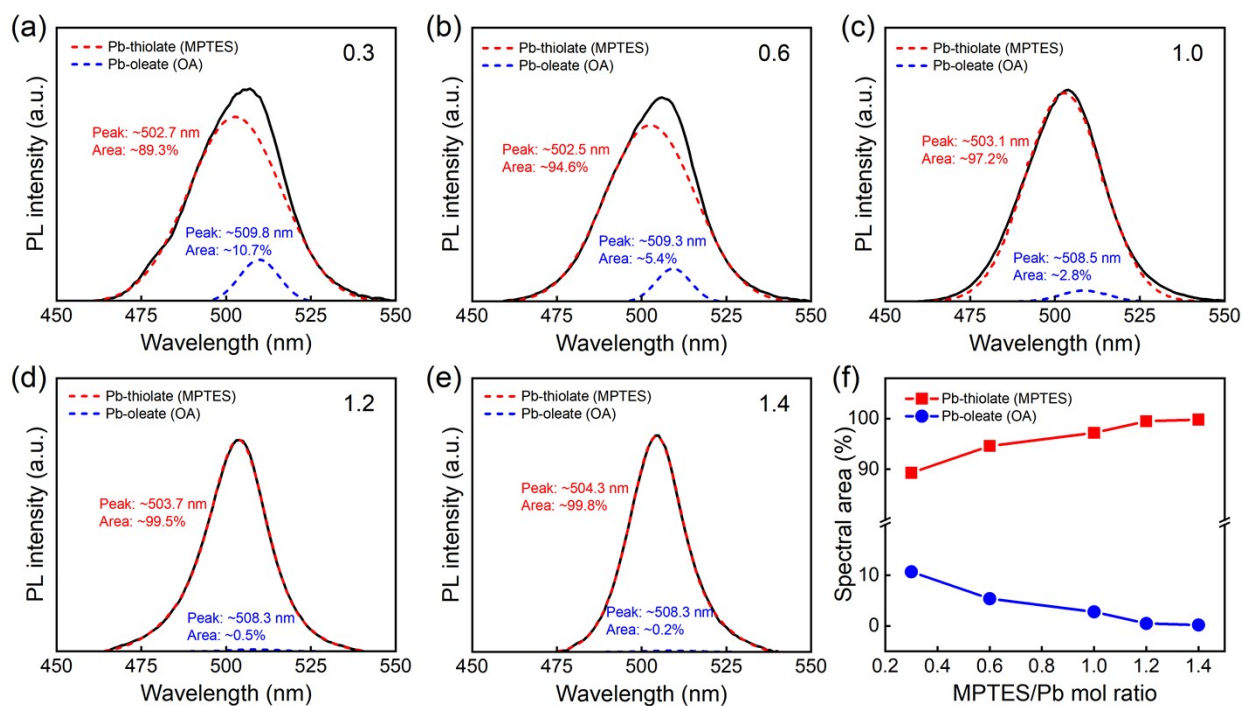

**Figure S2.** (a-e) Deconvoluted PL spectra of core-shell M-CsPbBr<sub>3</sub> QDs fabricated as a function of MPTES concertation (MPTES/Pb mol ratio). (f) Contribution of each CsPbBr<sub>3</sub> QDs (pristine CsPbBr<sub>3</sub> QDs and core-shell M-CsPbBr<sub>3</sub> QDs) fabricated from Pb-olate (OA) and Pb-thiolate (MPTES) to PL intensity. MPTES was injected into the Pb-pot immediately after degassing the Pb-pot. Reaction time was ~5 s.

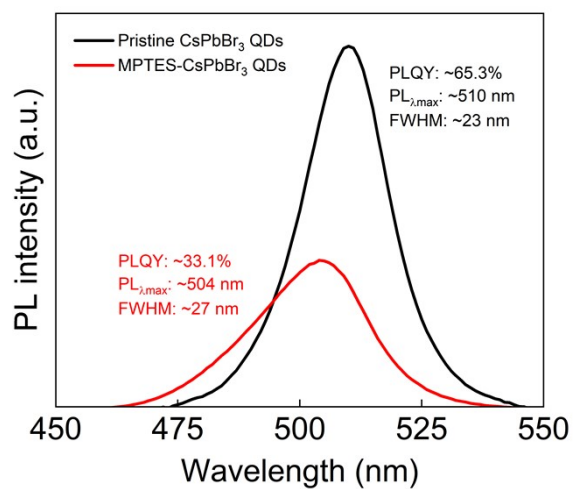

**Figure S3.** PL spectra of pristine CsPbBr<sub>3</sub> QDs and MPTES-CsPbBr<sub>3</sub> QDs. MPTES-CsPbBr<sub>3</sub> QDs were fabricated by substituting OA with MPTES (OA-free) as a ligand (see Experimental method). MPTES (MPTES/Pb mol ratio of 1.0) was injected into the Pb-pot immediately after degassing the Pb-pot. Reaction time was ~5 s.

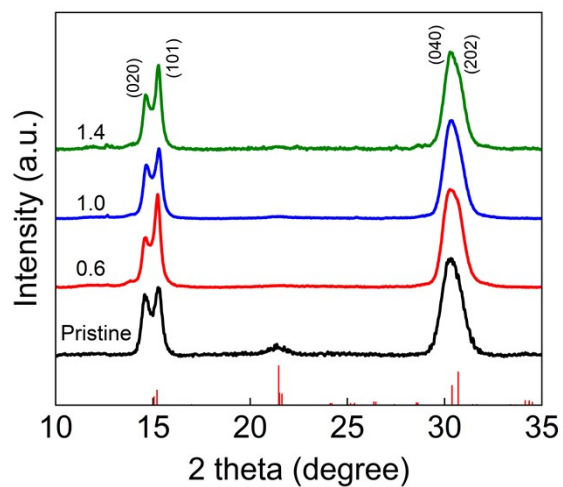

**Figure S4.** XRD patterns of pristine CsPbBr<sub>3</sub> QDs and core-shell M-CsPbBr<sub>3</sub> QDs as a function of MPTES concentration (MPTES/Pb mol ratio). The pristine CsPbBr<sub>3</sub> QDs and core-shell M-CsPbBr<sub>3</sub> QDs showed the orthorhombic crystal structure (JCPDS card no. 98-009-7851). MPTES was injected into the Pb-pot immediately after degassing the Pb-pot. Reaction time was ~5 s.

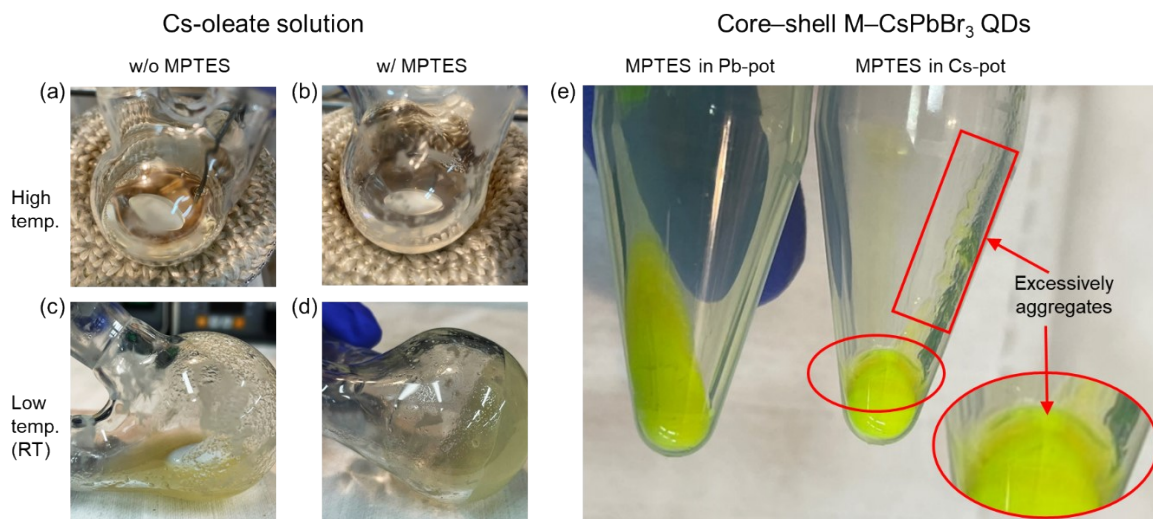

**Figure S5.** Digital photograph of **(a, c)** Cs-oleate solution and **(b, d)** Pre-mixed solution (Cs-oleate with MP TES). **(e)** Digital photograph of precipitated core-shell M-CsPbBr<sub>3</sub> QDs after purification. **(e, left)** The core-shell M-CsPbBr<sub>3</sub> QDs were fabricated using Cs-oleate solution. **(e, right)** core-shell M-CsPbBr<sub>3</sub> QDs was fabricated using pre-mixed (MP TES and Cs-oleate) solution.

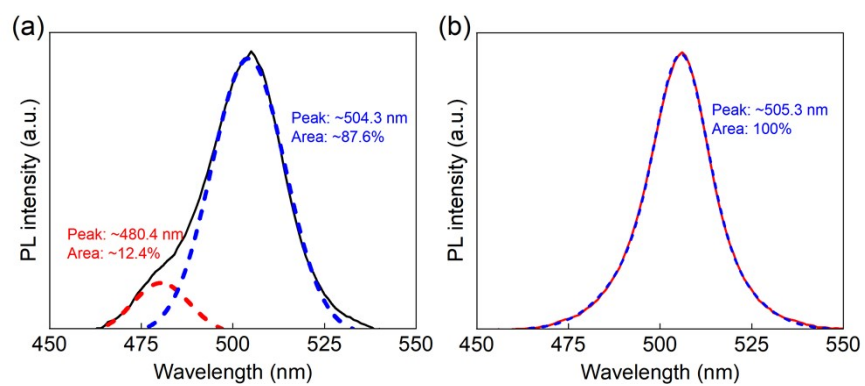

**Figure S6.** Deconvoluted PL spectra of core-shell M-CsPbBr<sub>3</sub> QDs fabricated under different reaction time. **(a)** ~5 s and **(b)** ~20 s. MPTES (MPTES/Pb mol ratio of 1.4) was injected into the Pb-pot immediately before Cs-oleate injection.

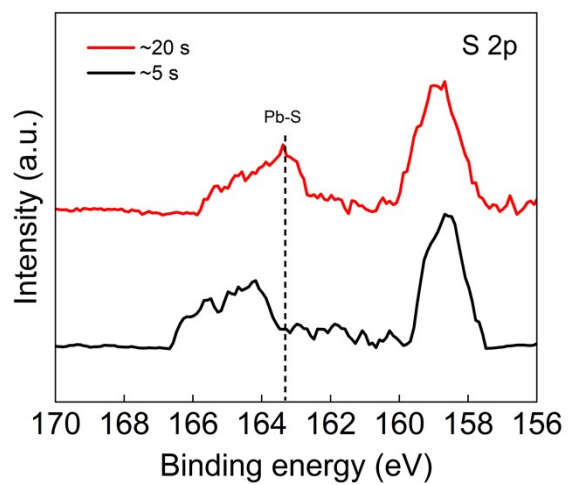

**Figure S7.** XPS spectra of core-shell M-CsPbBr<sub>3</sub> QDs fabricated under different reaction times. MPTES (MPTES/Pb mol ratio of 1.4) was injected into the Pb-pot immediately before Cs-oleate injection.



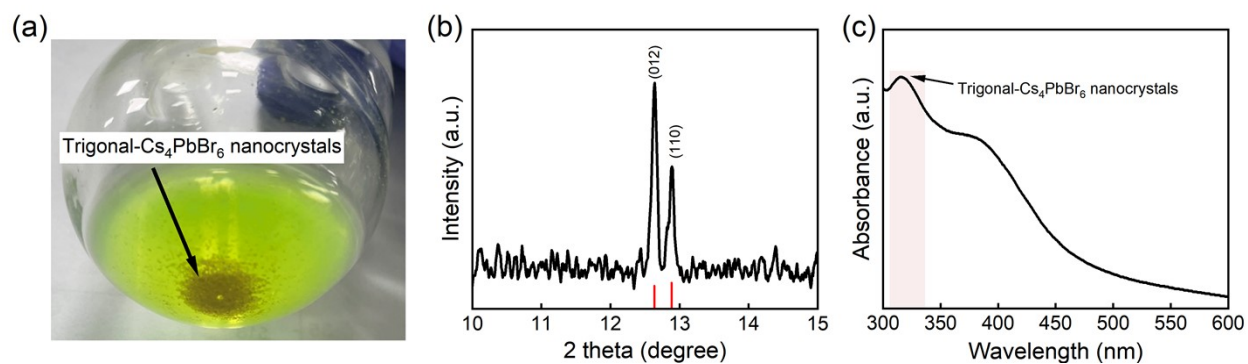

**Figure S8.** (a) Digital photograph of trigonal-Cs<sub>4</sub>PbBr<sub>6</sub> nanocrystals precipitated in crude solution. (b) XRD pattern, and (c) absorbance spectrum of trigonal-Cs<sub>4</sub>PbBr<sub>6</sub> nanocrystals. MPTES was injected into the Pb-pot immediately before Cs-oleate injection. MPTES/Pb mol ratio was 3.0 and reaction time was ~20s.

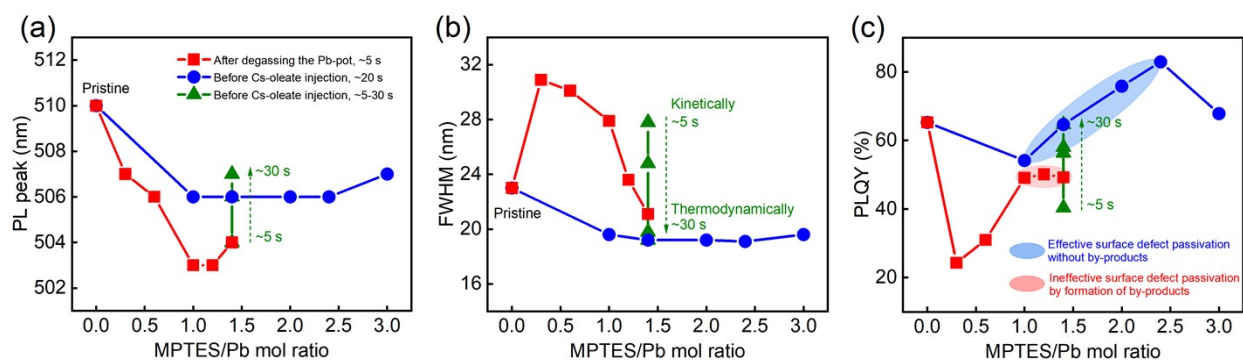

**Figure S9.** Effect of synthetic parameters (MP TES injection time, MP TES concentration (MP TES/Pb mol ratio), and reaction time) on the optical properties of core-shell M-CsPbBr<sub>3</sub> QDs. **(a)** PL<sub>λ<sub>max</sub></sub>, **(b)** FWHM, and **(c)** PLQYs.

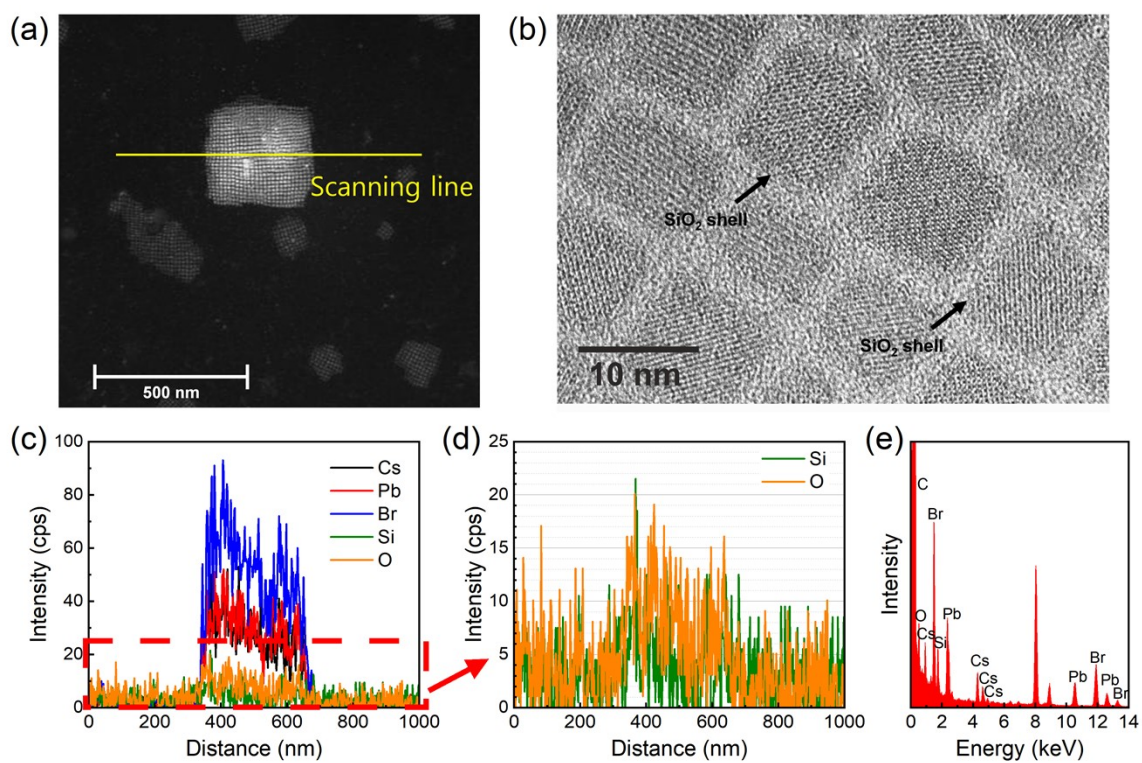

**Figure S10.** (a) Scanning transmission electron microscopy (STEM) image of core-shell M-CsPbBr<sub>3</sub> QDs cluster. (b) High magnified HR-TEM image of core-shell M-CsPbBr<sub>3</sub> QDs. (c-e) TEM-EDS line scanning profiles and spectrum.

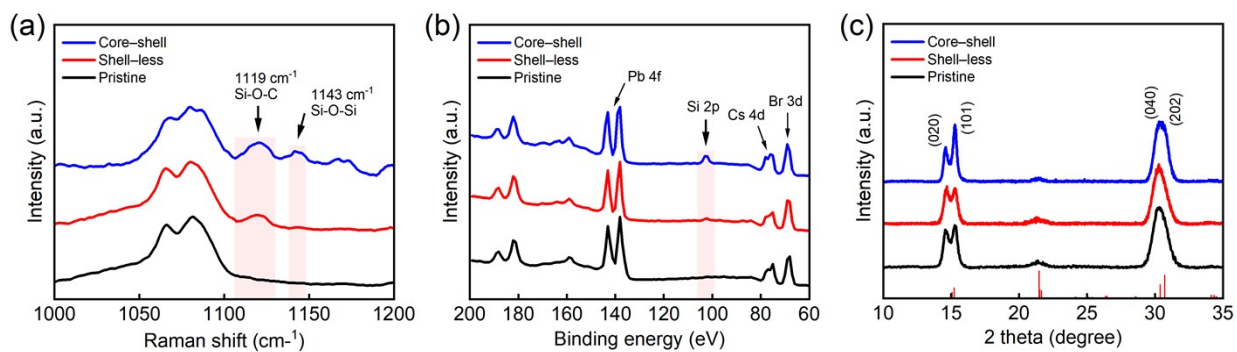

**Figure S11.** (a) Raman spectra, (b) XPS spectra and (c) XRD patterns of pristine  $\text{CsPbBr}_3$  QDs, shell-less M- $\text{CsPbBr}_3$  QDs and core-shell M- $\text{CsPbBr}_3$  QDs. MPTES was injected into the Pb-pot immediately before Cs-oleate injection. MPTES/Pb mol ratio was 2.4 and reaction time was  $\sim 20$  s.

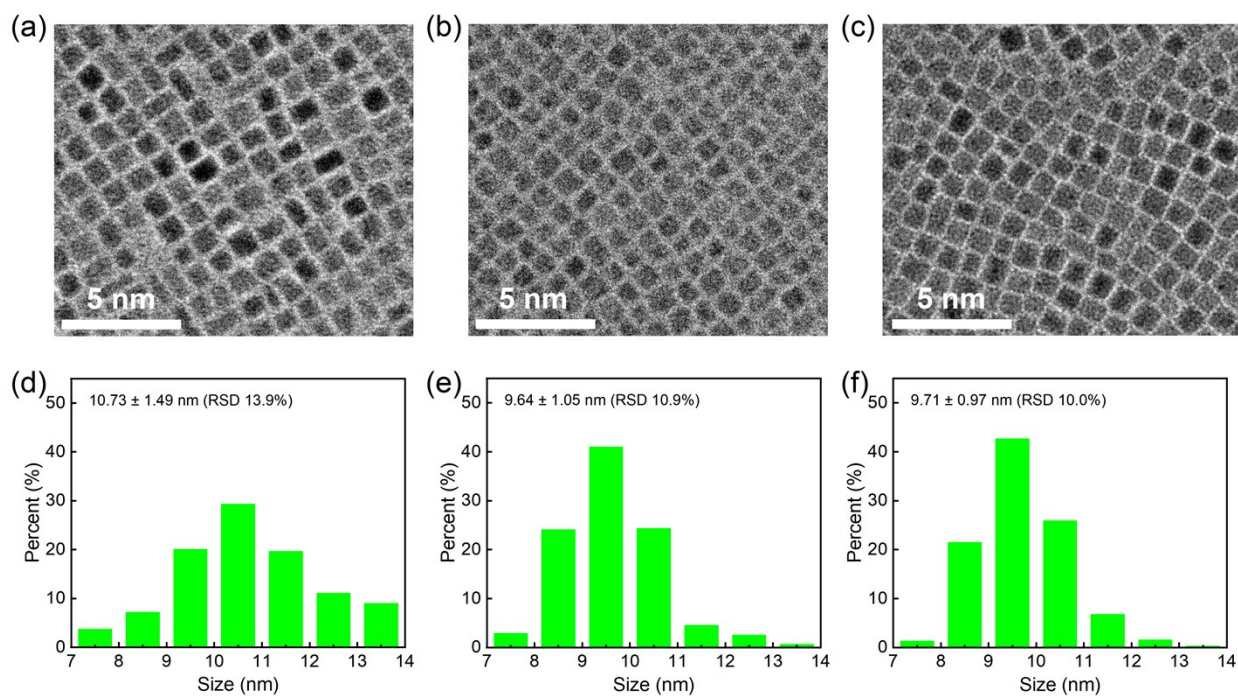

**Figure S12.** HR-TEM images and size distributions of three CsPbBr<sub>3</sub> QDs. **(a)** and **(d)** pristine CsPbBr<sub>3</sub> QDs, **(b)** and **(e)** shell-less M-CsPbBr<sub>3</sub> QDs, **(c)** and **(f)** core-shell M-CsPbBr<sub>3</sub> QDs. MPTES was injected into the Pb-pot immediately before Cs-oleate injection. MPTES/Pb mol ratio was 2.4 and reaction time was ~20 s.

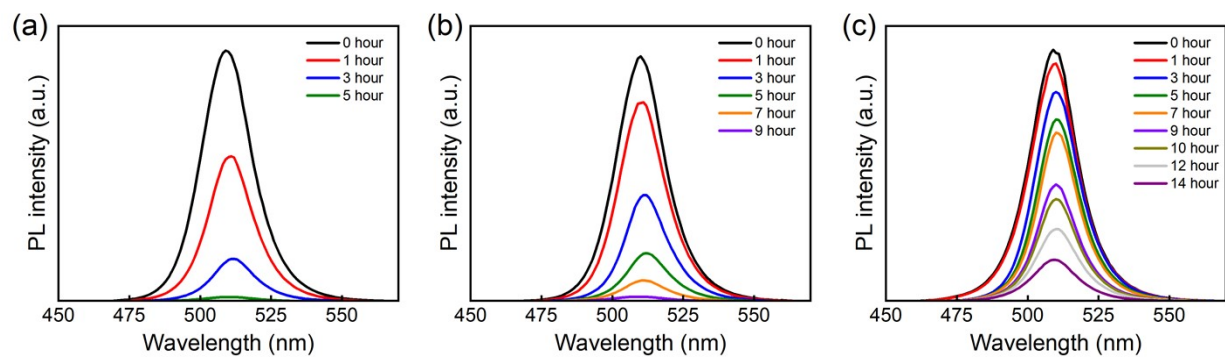

**Figure S13.** The PL spectra of (a) pristine CsPbBr<sub>3</sub> QDs, (b) shell-less M-CsPbBr<sub>3</sub> QDs, and (c) core-shell M CsPbBr<sub>3</sub> QDs as a function of immersion time in DI water.

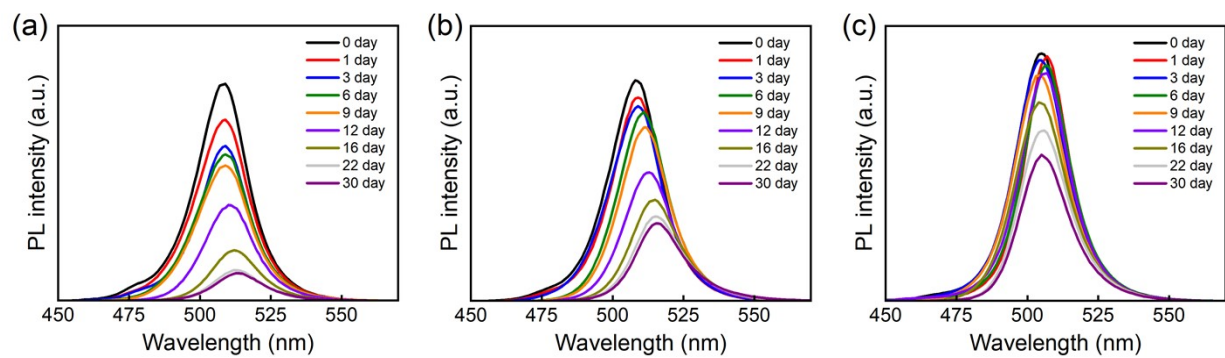

**Figure S14.** The PL spectra of (a) pristine CsPbBr<sub>3</sub> QDs, (b) shell-less M-CsPbBr<sub>3</sub> QDs, and (c) core-shell M-CsPbBr<sub>3</sub> QDs as a function of air exposure time.

**Table S1.** Element quantitative analysis result of core-shell M-CsPbBr<sub>3</sub> QDs

| Element | Weight % | Atomic % |
|---------|----------|----------|
| Cs      | 25.70    | 17.27    |
| Pb      | 30.75    | 13.25    |
| Br      | 37.14    | 41.49    |
| Si      | 3.24     | 10.30    |
| O       | 3.17     | 17.69    |



**Movie S1.** Color change of the Pb-pot after MPTES injection (MPTES/Pb mol ratio of 0.6). MPTES was injected into the Pb-pot immediately after degassing the Pb-pot. (8x speed).

**Movie S2.** Color change of the Pb-pot after MPTES injection (MPTES/Pb mol ratio of 1.4). MPTES was injected into the Pb-pot immediately after degassing the Pb-pot. (8x speed).

**Movie S3.** Color change of the Pb-pot after MPTES injection (MPTES/Pb mol ratio of 2.4). MPTES was injected into the Pb-pot immediately before Cs-oleate injection.
